# Supplementary material
Source: Springer Nature journal article supplement (https://www.springermedizin.de/resource/supplementary/12943_2012_1085_MOESM3_ESM.pdf/9552410)

**A.**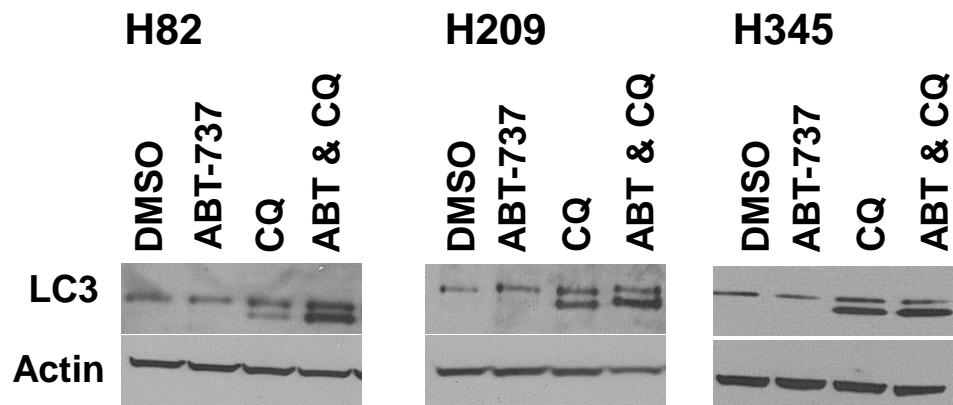**B.**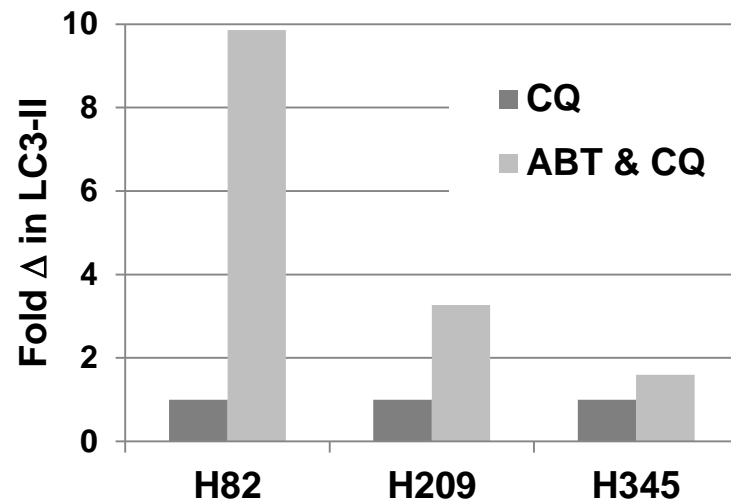**C.**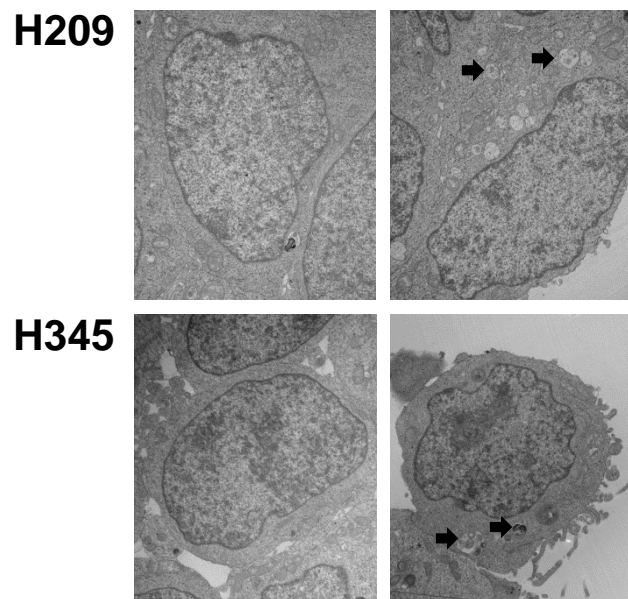**D.**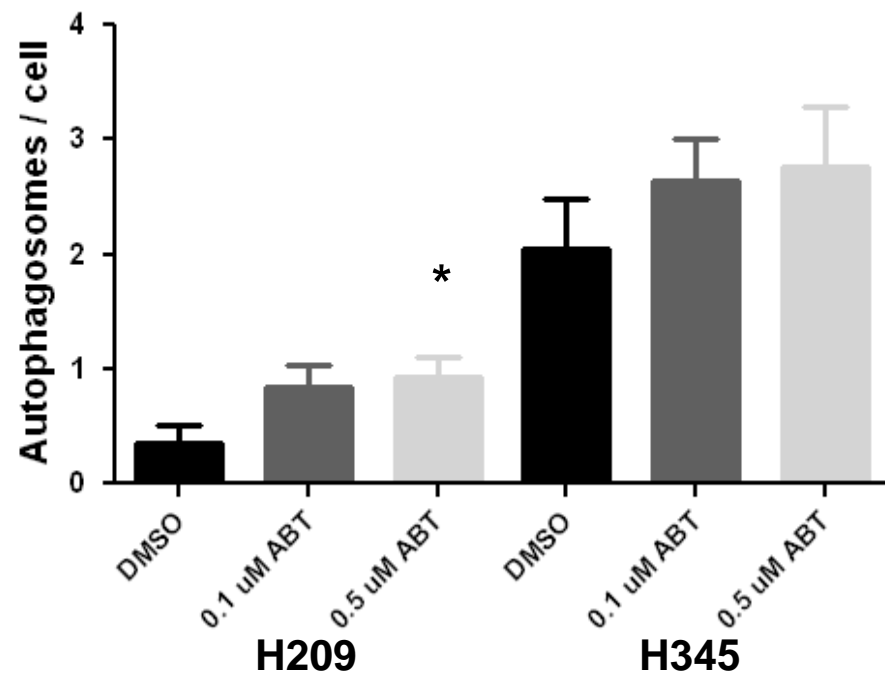

Supplement: MOESM3 [file 9552410]
